# Supplementary material for: The KNMI Large Ensemble Time Slice (KNMI–LENTIS)
Source: Copernicus journal article supplement (doi:10.5194/gmd-16-4581-2023), 2023-08-11
Supplement: Supplementary file 1 [file gmd-16-4581-2023-supplement.pdf]

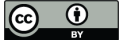

*Supplement of*

## **The KNMI Large Ensemble Time Slice (KNMI–LENTIS)**

**Laura Muntjewerf et al.**

*Correspondence to:* Laura Muntjewerf ([laura.muntjewerf@knmi.nl](mailto:laura.muntjewerf@knmi.nl))

The copyright of individual parts of the supplement might differ from the article licence.

| table            | variable                                                                                     | dimensions                         | long_name                                           | unit       | comment          |
|------------------|----------------------------------------------------------------------------------------------|------------------------------------|-----------------------------------------------------|------------|------------------|
| 3hr<br>164.128   | clt                                                                                          | longitude latitude time            | Total Cloud Cover Percentage                        | %          | ifs code name =  |
| 3hr<br>147.128   | hfls                                                                                         | longitude latitude time            | Surface Upward Latent Heat Flux                     | W m-2      | ifs code name =  |
| 3hr<br>146.128   | hfss                                                                                         | longitude latitude time            | Surface Upward Sensible Heat Flux                   | W m-2      | ifs code name =  |
| 3hr<br>81.129,   | huss                                                                                         | longitude latitude time1 height2m  | Near-Surface Specific Humidity                      | 1          | ifs code name =  |
| 3hr<br>81.129,   | expression = 1./((1.+1.608*(var134*exp(-17.62*(var168-273.15)/(var168-30.03))/611.-1.))      |                                    |                                                     |            |                  |
| 3hr<br>mrro ifs  | code name = 205.128                                                                          | longitude latitude time            | Total Runoff                                        | kg m-2 s-1 | lpjg code name = |
| 3hr<br>mrsos ifs | mrsos                                                                                        | longitude latitude time1 sdepth1   | Moisture in Upper Portion of Soil Column            | kg m-2     | lpjg code name = |
| 3hr<br>228.128   | pr                                                                                           | longitude latitude time            | Precipitation                                       | kg m-2 s-1 | ifs code name =  |
| 3hr<br>143.128   | prc                                                                                          | longitude latitude time            | Convective Precipitation                            | kg m-2 s-1 | ifs code name =  |
| 3hr<br>144.128   | prsn                                                                                         | longitude latitude time            | Snowfall Flux                                       | kg m-2 s-1 | ifs code name =  |
| 3hr<br>ps ifs    | code name = 134.128                                                                          | longitude latitude time1           | Surface Air Pressure                                | Pa         | tm5 code name =  |
| 3hr<br>175.128   | rlds                                                                                         | longitude latitude time            | Surface Downwelling Longwave Radiation              | W m-2      | ifs code name =  |
| 3hr<br>104.129,  | rldscs                                                                                       | longitude latitude time            | Surface Downwelling Clear-Sky Longwave Radiation    | W m-2      | ifs code name =  |
| 3hr<br>96.129,   | expression = var211-var177+var175                                                            |                                    |                                                     |            |                  |
| 3hr<br>169.128   | rlus                                                                                         | longitude latitude time            | Surface Upwelling Longwave Radiation                | W m-2      | ifs code name =  |
| 3hr<br>132.129,  | expression = var177-var175                                                                   |                                    |                                                     |            |                  |
| 3hr<br>95.129,   | rsds                                                                                         | longitude latitude time            | Surface Downwelling Shortwave Radiation             | W m-2      | ifs code name =  |
| 3hr<br>131.129,  | rsdscs                                                                                       | longitude latitude time            | Surface Downwelling Clear-Sky Shortwave Radiation   | W m-2      | ifs code name =  |
| 3hr<br>95.129,   | expression = (var176<=1e-10)*var210+(var176>1e-10)*var210*var169/var176                      |                                    |                                                     |            |                  |
| 3hr<br>131.129,  | rsus                                                                                         | longitude latitude time            | Surface Upwelling Shortwave Radiation               | W m-2      | ifs code name =  |
| 3hr<br>167.128   | expression = var176-var169                                                                   |                                    |                                                     |            |                  |
| 3hr<br>165.128   | rsuscs                                                                                       | longitude latitude time            | Surface Upwelling Clear-Sky Shortwave Radiation     | W m-2      | ifs code name =  |
| 3hr<br>166.128   | expression = (var176>1e-10)*var210*(1-var169/var176)                                         |                                    |                                                     |            |                  |
| 3hr<br>167.128   | tas                                                                                          | longitude latitude time1 height2m  | Near-Surface Air Temperature                        | K          | ifs code name =  |
| 3hr<br>165.128   | uas                                                                                          | longitude latitude time1 height10m | Eastward Near-Surface Wind                          | m s-1      | ifs code name =  |
| 3hr<br>166.128   | vas                                                                                          | longitude latitude time1 height10m | Northward Near-Surface Wind                         | m s-1      | ifs code name =  |
| SImon<br>siage   | siage                                                                                        | longitude latitude time            | Age of Sea Ice                                      | s          | nemo code name = |
| SImon<br>siconc  | siconc                                                                                       | longitude latitude time typesi     | Sea-Ice Area Percentage (Ocean Grid)                | %          | nemo code name = |
| SImon<br>siconca | siconca                                                                                      | longitude latitude time typesi     | Sea-Ice Area Percentage (Atmospheric Grid)          | %          | ifs code name =  |
| 31.129,          | expression = var31 / (var172<=0.5)                                                           |                                    |                                                     |            |                  |
| SImon<br>simass  | simass                                                                                       | longitude latitude time            | Sea-Ice Mass per Area                               | kg m-2     | nemo code name = |
| SImon<br>sithick | sithick                                                                                      | longitude latitude time            | Sea Ice Thickness                                   | m          | nemo code name = |
| SImon<br>sivol   | sivol                                                                                        | longitude latitude time            | Sea-Ice Volume per Area                             | m          | nemo code name = |
| Amon<br>79.128   | clivi                                                                                        | longitude latitude time            | Ice Water Path                                      | kg m-2     | ifs code name =  |
| Amon<br>164.128  | clt                                                                                          | longitude latitude time            | Total Cloud Cover Percentage                        | %          | ifs code name =  |
| Amon<br>116.129, | clwvi                                                                                        | longitude latitude time            | Condensed Water Path                                | kg m-2     | ifs code name =  |
| Amon<br>182.128  | expression = var78+var79                                                                     |                                    |                                                     |            |                  |
| Amon<br>147.128  | evspsbl                                                                                      | longitude latitude time            | Evaporation Including Sublimation and Transpiration | kg m-2 s-1 | ifs code name =  |
| Amon<br>146.128  | hfls                                                                                         | longitude latitude time            | Surface Upward Latent Heat Flux                     | W m-2      | ifs code name =  |
| Amon<br>157.128  | hfss                                                                                         | longitude latitude time            | Surface Upward Sensible Heat Flux                   | W m-2      | ifs code name =  |
| Amon<br>80.129,  | hur                                                                                          | longitude latitude plev19 time     | Relative Humidity                                   | %          | ifs code name =  |
| Amon<br>133.128  | hurs                                                                                         | longitude latitude time height2m   | Near-Surface Relative Humidity                      | %          | ifs code name =  |
| Amon<br>133.128  | expression = 100.*exp(17.62*((var168-273.15)/(var168-30.03))-(var167-273.15)/(var167-30.03)) |                                    |                                                     |            |                  |
| Amon<br>81.129,  | hus                                                                                          | longitude latitude plev19 time     | Specific Humidity                                   | 1          | ifs code name =  |
| Amon<br>81.129,  | huss                                                                                         | longitude latitude time height2m   | Near-Surface Specific Humidity                      | 1          | ifs code name =  |
| Amon<br>81.129,  | expression = 1./((1.+1.608*(var134*exp(-17.62*(var168-273.15)/(var168-30.03))/611.-1.))      |                                    |                                                     |            |                  |

|                                                                                  |          |                                   |                                                                             |            |                  |
|----------------------------------------------------------------------------------|----------|-----------------------------------|-----------------------------------------------------------------------------|------------|------------------|
| Amon                                                                             | pr       | longitude latitude time           | Precipitation                                                               | kg m-2 s-1 | ifs code name =  |
| 228.128                                                                          |          |                                   |                                                                             |            |                  |
| Amon                                                                             | prc      | longitude latitude time           | Convective Precipitation                                                    | kg m-2 s-1 | ifs code name =  |
| 143.128                                                                          |          |                                   |                                                                             |            |                  |
| Amon                                                                             | prsn     | longitude latitude time           | Snowfall Flux                                                               | kg m-2 s-1 | ifs code name =  |
| 144.128                                                                          |          |                                   |                                                                             |            |                  |
| Amon                                                                             | prw      | longitude latitude time           | Water Vapor Path                                                            | kg m-2     | ifs code name =  |
| 137.128                                                                          |          |                                   |                                                                             |            |                  |
| Amon                                                                             | ps       | longitude latitude time           | Surface Air Pressure                                                        | Pa         | tm5 code name =  |
| ps ifs code name = 134.128                                                       |          |                                   |                                                                             |            |                  |
| Amon                                                                             | psl      | longitude latitude time           | Sea Level Pressure                                                          | Pa         | ifs code name =  |
| 151.128                                                                          |          |                                   |                                                                             |            |                  |
| Amon                                                                             | rlds     | longitude latitude time           | Surface Downwelling Longwave Radiation                                      | W m-2      | ifs code name =  |
| 175.128                                                                          |          |                                   |                                                                             |            |                  |
| Amon                                                                             | rldscs   | longitude latitude time           | Surface Downwelling Clear-Sky Longwave Radiation                            | W m-2      | ifs code name =  |
| 104.129, expression = var211-var177+var175                                       |          |                                   |                                                                             |            |                  |
| Amon                                                                             | rflus    | longitude latitude time           | Surface Upwelling Longwave Radiation                                        | W m-2      | ifs code name =  |
| 96.129, expression = var177-var175                                               |          |                                   |                                                                             |            |                  |
| Amon                                                                             | rlut     | longitude latitude time           | TOA Outgoing Longwave Radiation                                             | W m-2      | ifs code name =  |
| 179.128                                                                          |          |                                   |                                                                             |            |                  |
| Amon                                                                             | rlutcs   | longitude latitude time           | TOA Outgoing Clear-Sky Longwave Radiation                                   | W m-2      | ifs code name =  |
| 209.128                                                                          |          |                                   |                                                                             |            |                  |
| Amon                                                                             | rsds     | longitude latitude time           | Surface Downwelling Shortwave Radiation                                     | W m-2      | ifs code name =  |
| 169.128                                                                          |          |                                   |                                                                             |            |                  |
| Amon                                                                             | rsdscs   | longitude latitude time           | Surface Downwelling Clear-Sky Shortwave Radiation                           | W m-2      | ifs code name =  |
| 132.129, expression = (var176<=1e-10)*var210+(var176>1e-10)*var210*var169/var176 |          |                                   |                                                                             |            |                  |
| Amon                                                                             | rsdt     | longitude latitude time           | TOA Incident Shortwave Radiation                                            | W m-2      | ifs code name =  |
| 212.128                                                                          |          |                                   |                                                                             |            |                  |
| Amon                                                                             | rsus     | longitude latitude time           | Surface Upwelling Shortwave Radiation                                       | W m-2      | ifs code name =  |
| 95.129, expression = var176-var169                                               |          |                                   |                                                                             |            |                  |
| Amon                                                                             | rsuscs   | longitude latitude time           | Surface Upwelling Clear-Sky Shortwave Radiation                             | W m-2      | ifs code name =  |
| 131.129, expression = (var176>1e-10)*var210*(1-var169/var176)                    |          |                                   |                                                                             |            |                  |
| Amon                                                                             | rsut     | longitude latitude time           | TOA Outgoing Shortwave Radiation                                            | W m-2      | ifs code name =  |
| 97.129, expression = var178-var212                                               |          |                                   |                                                                             |            |                  |
| Amon                                                                             | rsutcs   | longitude latitude time           | TOA Outgoing Clear-Sky Shortwave Radiation                                  | W m-2      | ifs code name =  |
| 103.129, expression = var208-var212                                              |          |                                   |                                                                             |            |                  |
| Amon                                                                             | rtmt     | longitude latitude time           | Net Downward Radiative Flux at Top of Model                                 | W m-2      | ifs code name =  |
| 98.129, expression = var178+var179                                               |          |                                   |                                                                             |            |                  |
| Amon                                                                             | sbl      | longitude latitude time           | Surface Snow and Ice Sublimation Flux                                       | kg m-2 s-1 | ifs code name =  |
| 44.128                                                                           |          |                                   |                                                                             |            |                  |
| Amon                                                                             | sfcWind  | longitude latitude time height10m | Near-Surface Wind Speed                                                     | m s-1      | ifs code name =  |
| 214.129, expression = sqrt(sqrt(var165)+sqrt(var166))                            |          |                                   |                                                                             |            |                  |
| Amon                                                                             | ta       | longitude latitude plev19 time    | Air Temperature                                                             | K          | ifs code name =  |
| 130.128                                                                          |          |                                   |                                                                             |            |                  |
| Amon                                                                             | tas      | longitude latitude time height2m  | Near-Surface Air Temperature                                                | K          | ifs code name =  |
| 167.128                                                                          |          |                                   |                                                                             |            |                  |
| Amon                                                                             | tasmax   | longitude latitude time height2m  | Daily Maximum Near-Surface Air Temperature                                  | K          | ifs code name =  |
| 201.128                                                                          |          |                                   |                                                                             |            |                  |
| Amon                                                                             | tasmin   | longitude latitude time height2m  | Daily Minimum Near-Surface Air Temperature                                  | K          | ifs code name =  |
| 202.128                                                                          |          |                                   |                                                                             |            |                  |
| Amon                                                                             | ts       | longitude latitude time           | Surface Temperature                                                         | K          | ifs code name =  |
| 139.128                                                                          |          |                                   |                                                                             |            |                  |
| Amon                                                                             | ua       | longitude latitude plev19 time    | Eastward Wind                                                               | m s-1      | ifs code name =  |
| 131.128                                                                          |          |                                   |                                                                             |            |                  |
| Amon                                                                             | uas      | longitude latitude time height10m | Eastward Near-Surface Wind                                                  | m s-1      | ifs code name =  |
| 165.128                                                                          |          |                                   |                                                                             |            |                  |
| Amon                                                                             | va       | longitude latitude plev19 time    | Northward Wind                                                              | m s-1      | ifs code name =  |
| 132.128                                                                          |          |                                   |                                                                             |            |                  |
| Amon                                                                             | vas      | longitude latitude time height10m | Northward Near-Surface Wind                                                 | m s-1      | ifs code name =  |
| 166.128                                                                          |          |                                   |                                                                             |            |                  |
| Amon                                                                             | wap      | longitude latitude plev19 time    | Omega (=dp/dt)                                                              | Pa s-1     | ifs code name =  |
| 135.128                                                                          |          |                                   |                                                                             |            |                  |
| Amon                                                                             | zg       | longitude latitude plev19 time    | Geopotential Height                                                         | m          | ifs code name =  |
| 129.128                                                                          |          |                                   |                                                                             |            |                  |
| Omon                                                                             | evs      | longitude latitude time           | Water Evaporation Flux Where Ice Free Ocean over Sea                        | kg m-2 s-1 | nemo code name = |
| evs                                                                              |          |                                   |                                                                             |            |                  |
| Omon                                                                             | friver   | longitude latitude time           | Water Flux into Sea Water from Rivers                                       | kg m-2 s-1 | nemo code name = |
| friver                                                                           |          |                                   |                                                                             |            |                  |
| Omon                                                                             | fsitherm | longitude latitude time           | Water Flux into Sea Water Due to Sea Ice Thermodynamics                     | kg m-2 s-1 | nemo code name = |
| fsitherm                                                                         |          |                                   |                                                                             |            |                  |
| Omon                                                                             | hfbasin  | latitude basin time               | Northward Ocean Heat Transport                                              | W          | nemo code name = |
| hfbasin                                                                          |          |                                   |                                                                             |            |                  |
| Omon                                                                             | hfds     | longitude latitude time           | Downward Heat Flux at Sea Water Surface                                     | W m-2      | nemo code name = |
| hfds                                                                             |          |                                   |                                                                             |            |                  |
| Omon                                                                             | hfevapds | longitude latitude time           | Temperature Flux Due to Evaporation Expressed as Heat Flux out of Sea Water | W m-2      | nemo code name = |

|           |           |                                    |                                                                        |            |  |                  |
|-----------|-----------|------------------------------------|------------------------------------------------------------------------|------------|--|------------------|
| hfevapds  |           |                                    |                                                                        |            |  |                  |
| Omon      | hfgeou    | longitude latitude time            | Upward Geothermal Heat Flux at Sea Floor                               | W m-2      |  | nemo code name = |
| hfgeou    |           |                                    |                                                                        |            |  |                  |
| Omon      | hfrainds  | longitude latitude time            | Temperature Flux Due to Rainfall Expressed as Heat Flux into Sea Water | W m-2      |  | nemo code name = |
| hfrainds  |           |                                    |                                                                        |            |  |                  |
| Omon      | htovgyre  | latitude basin time                | Northward Ocean Heat Transport Due to Gyre                             | W          |  | nemo code name = |
| htovgyre  |           |                                    |                                                                        |            |  |                  |
| Omon      | htovovrt  | latitude basin time                | Northward Ocean Heat Transport Due to Overturning                      | W          |  | nemo code name = |
| htovovrt  |           |                                    |                                                                        |            |  |                  |
| Omon      | masso     | time                               | Sea Water Mass                                                         | kg         |  | nemo code name = |
| masso     |           |                                    |                                                                        |            |  |                  |
| Omon      | m1otst    | longitude latitude time            | Ocean Mixed Layer Thickness Defined by Sigma T                         | m          |  | nemo code name = |
| m1otst    |           |                                    |                                                                        |            |  |                  |
| Omon      | msftbarot | longitude latitude time            | Ocean Barotropic Mass Streamfunction                                   | kg s-1     |  | nemo code name = |
| msftbarot |           |                                    |                                                                        |            |  |                  |
| Omon      | msftyz    | gridlatitude olevel basin time     | Ocean Y Overturning Mass Streamfunction                                | kg s-1     |  | nemo code name = |
| msftyz    |           |                                    |                                                                        |            |  |                  |
| Omon      | pbo       | longitude latitude time            | Sea Water Pressure at Sea Floor                                        | Pa         |  | nemo code name = |
| pbo       |           |                                    |                                                                        |            |  |                  |
| Omon      | pso       | longitude latitude time            | Sea Water Pressure at Sea Water Surface                                | Pa         |  | nemo code name = |
| pso       |           |                                    |                                                                        |            |  |                  |
| Omon      | rsntds    | longitude latitude time            | Net Downward Shortwave Radiation at Sea Water Surface                  | W m-2      |  | nemo code name = |
| rsntds    |           |                                    |                                                                        |            |  |                  |
| Omon      | sfdsi     | longitude latitude time            | Downward Sea Ice Basal Salt Flux                                       | kg m-2 s-1 |  | nemo code name = |
| sfdsi     |           |                                    |                                                                        |            |  |                  |
| Omon      | sltovgyre | latitude basin time                | Northward Ocean Salt Transport Due to Gyre                             | kg s-1     |  | nemo code name = |
| sltovgyre |           |                                    |                                                                        |            |  |                  |
| Omon      | sltovovrt | latitude basin time                | Northward Ocean Salt Transport Due to Overturning                      | kg s-1     |  | nemo code name = |
| sltovovrt |           |                                    |                                                                        |            |  |                  |
| Omon      | soga      | time                               | Global Mean Sea Water Salinity                                         | 0.001      |  | nemo code name = |
| soga      |           |                                    |                                                                        |            |  |                  |
| Omon      | sos       | longitude latitude time            | Sea Surface Salinity                                                   | 0.001      |  | nemo code name = |
| sos       |           |                                    |                                                                        |            |  |                  |
| Omon      | thetaoga  | time                               | Global Average Sea Water Potential Temperature                         | degC       |  | nemo code name = |
| thetaoga  |           |                                    |                                                                        |            |  |                  |
| Omon      | tos       | longitude latitude time            | Sea Surface Temperature                                                | degC       |  | nemo code name = |
| tos       |           |                                    |                                                                        |            |  |                  |
| Omon      | tosga     | time                               | Global Average Sea Surface Temperature                                 | degC       |  | nemo code name = |
| tosga     |           |                                    |                                                                        |            |  |                  |
| Omon      | tossq     | longitude latitude time            | Square of Sea Surface Temperature                                      | degC2      |  | nemo code name = |
| tossq     |           |                                    |                                                                        |            |  |                  |
| Omon      | volo      | time                               | Sea Water Volume                                                       | m3         |  | nemo code name = |
| volo      |           |                                    |                                                                        |            |  |                  |
| Omon      | wfo       | longitude latitude time            | Water Flux into Sea Water                                              | kg m-2 s-1 |  | nemo code name = |
| wfo       |           |                                    |                                                                        |            |  |                  |
| Omon      | wfonocorr | longitude latitude time            | Water Flux into Sea Water Without Flux Correction                      | kg m-2 s-1 |  | nemo code name = |
| wfonocorr |           |                                    |                                                                        |            |  |                  |
| Omon      | zhalfo    | longitude latitude olevelhalf time | Depth Below Geoid of Interfaces Between Ocean Layers                   | m          |  | nemo code name = |
| zhalfo    |           |                                    |                                                                        |            |  |                  |
| Omon      | zos       | longitude latitude time            | Sea Surface Height Above Geoid                                         | m          |  | nemo code name = |
| zos       |           |                                    |                                                                        |            |  |                  |
| Omon      | zossq     | longitude latitude time            | Square of Sea Surface Height Above Geoid                               | m2         |  | nemo code name = |
| zossq     |           |                                    |                                                                        |            |  |                  |
| Omon      | zostoga   | time                               | Global Average Thermosteric Sea Level Change                           | m          |  | nemo code name = |
| zostoga   |           |                                    |                                                                        |            |  |                  |
| fx        | areacella | longitude latitude                 | Grid-Cell Area for Atmospheric Grid Variables                          | m2         |  | ifs code name =  |
| 129.128   |           |                                    |                                                                        |            |  |                  |
| fx        | orog      | longitude latitude                 | Surface Altitude                                                       | m          |  | ifs code name =  |
| 129.128   |           |                                    |                                                                        |            |  |                  |
| fx        | sftlf     | longitude latitude                 | Percentage of the Grid Cell Occupied by Land (Including Lakes)         | %          |  | ifs code name =  |
| 172.128   |           |                                    |                                                                        |            |  |                  |
| 6hrPlev   | wap4      | longitude latitude plev4 time      | Omega (=dp/dt)                                                         | Pa s-1     |  | ifs code name =  |
| 135.128   |           |                                    |                                                                        |            |  |                  |
| 6hrPlev   | wsgmax10m | longitude latitude time height10m  | Maximum Wind Speed of Gust at 10m                                      | m s-1      |  | ifs code name =  |
| 49.128    |           |                                    |                                                                        |            |  |                  |
| day       | clt       | longitude latitude time            | Total Cloud Cover Percentage                                           | %          |  | ifs code name =  |
| 164.128   |           |                                    |                                                                        |            |  |                  |
| day       | hfls      | longitude latitude time            | Surface Upward Latent Heat Flux                                        | W m-2      |  | ifs code name =  |
| 147.128   |           |                                    |                                                                        |            |  |                  |
| day       | hfss      | longitude latitude time            | Surface Upward Sensible Heat Flux                                      | W m-2      |  | ifs code name =  |
| 146.128   |           |                                    |                                                                        |            |  |                  |
| day       | hur       | longitude latitude plev8 time      | Relative Humidity                                                      | %          |  | ifs code name =  |
| 157.128   |           |                                    |                                                                        |            |  |                  |

|          |                                                                                              |                                   |                                              |            |                  |
|----------|----------------------------------------------------------------------------------------------|-----------------------------------|----------------------------------------------|------------|------------------|
| day      | hurs                                                                                         | longitude latitude time height2m  | Near-Surface Relative Humidity               | %          | ifs code name =  |
| 80.129,  | expression = 100.*exp(17.62*((var168-273.15)/(var168-30.03))-(var167-273.15)/(var167-30.03)) |                                   |                                              |            |                  |
| day      | hursmax                                                                                      | longitude latitude time height2m  | Daily Maximum Near-Surface Relative Humidity | %          | ifs code name =  |
| 80.129,  | expression = 100.*exp(17.62*((var168-273.15)/(var168-30.03))-(var167-273.15)/(var167-30.03)) |                                   |                                              |            |                  |
| day      | hursmin                                                                                      | longitude latitude time height2m  | Daily Minimum Near-Surface Relative Humidity | %          | ifs code name =  |
| 80.129,  | expression = 100.*exp(17.62*((var168-273.15)/(var168-30.03))-(var167-273.15)/(var167-30.03)) |                                   |                                              |            |                  |
| day      | hus                                                                                          | longitude latitude plev8 time     | Specific Humidity                            | 1          | ifs code name =  |
| 133.128  |                                                                                              |                                   |                                              |            |                  |
| day      | huss                                                                                         | longitude latitude time height2m  | Near-Surface Specific Humidity               | 1          | ifs code name =  |
| 81.129,  | expression = 1./(1.+1.608*(var134*exp(-17.62*(var168-273.15)/(var168-30.03))/611.-1.))       |                                   |                                              |            |                  |
| day      | mrro                                                                                         | longitude latitude time           | Total Runoff                                 | kg m-2 s-1 | lpjg code name = |
| mrro ifs | code name = 205.128                                                                          |                                   |                                              |            |                  |
| day      | mrso                                                                                         | longitude latitude time           | Total Soil Moisture Content                  | kg m-2     | lpjg code name = |
| mrso ifs | code name = 43.129, expression = 70*var39+210*var40+720*var41+1890*var42                     |                                   |                                              |            |                  |
| day      | mrso                                                                                         | longitude latitude time sdepth1   | Moisture in Upper Portion of Soil Column     | kg m-2     | lpjg code name = |
| mrso ifs | code name = 99.129, expression = 70*var39+30*var40                                           |                                   |                                              |            |                  |
| day      | pr                                                                                           | longitude latitude time           | Precipitation                                | kg m-2 s-1 | ifs code name =  |
| 228.128  |                                                                                              |                                   |                                              |            |                  |
| day      | prc                                                                                          | longitude latitude time           | Convective Precipitation                     | kg m-2 s-1 | ifs code name =  |
| 143.128  |                                                                                              |                                   |                                              |            |                  |
| day      | prsn                                                                                         | longitude latitude time           | Snowfall Flux                                | kg m-2 s-1 | ifs code name =  |
| 144.128  |                                                                                              |                                   |                                              |            |                  |
| day      | psl                                                                                          | longitude latitude time           | Sea Level Pressure                           | Pa         | ifs code name =  |
| 151.128  |                                                                                              |                                   |                                              |            |                  |
| day      | rlds                                                                                         | longitude latitude time           | Surface Downwelling Longwave Radiation       | W m-2      | ifs code name =  |
| 175.128  |                                                                                              |                                   |                                              |            |                  |
| day      | rhus                                                                                         | longitude latitude time           | Surface Upwelling Longwave Radiation         | W m-2      | ifs code name =  |
| 96.129,  | expression = var177-var175                                                                   |                                   |                                              |            |                  |
| day      | rlut                                                                                         | longitude latitude time           | TOA Outgoing Longwave Radiation              | W m-2      | ifs code name =  |
| 179.128  |                                                                                              |                                   |                                              |            |                  |
| day      | rsds                                                                                         | longitude latitude time           | Surface Downwelling Shortwave Radiation      | W m-2      | ifs code name =  |
| 169.128  |                                                                                              |                                   |                                              |            |                  |
| day      | rsus                                                                                         | longitude latitude time           | Surface Upwelling Shortwave Radiation        | W m-2      | ifs code name =  |
| 95.129,  | expression = var176-var169                                                                   |                                   |                                              |            |                  |
| day      | sfcWind                                                                                      | longitude latitude time height10m | Daily-Mean Near-Surface Wind Speed           | m s-1      | ifs code name =  |
| 214.129, | expression = sqrt(sqrt(var165)+sqrt(var166))                                                 |                                   |                                              |            |                  |
| day      | sfcWindmax                                                                                   | longitude latitude time height10m | Daily Maximum Near-Surface Wind Speed        | m s-1      | ifs code name =  |
| 214.129, | expression = sqrt(sqrt(var165)+sqrt(var166))                                                 |                                   |                                              |            |                  |
| day      | snc                                                                                          | longitude latitude time           | Snow Area Percentage                         | %          | ifs code name =  |
| 119.129, | expression = 100*(var141>0)                                                                  |                                   |                                              |            |                  |
| day      | snw                                                                                          | longitude latitude time           | Surface Snow Amount                          | kg m-2     | ifs code name =  |
| 141.128  |                                                                                              |                                   |                                              |            |                  |
| day      | ta                                                                                           | longitude latitude plev8 time     | Air Temperature                              | K          | ifs code name =  |
| 130.128  |                                                                                              |                                   |                                              |            |                  |
| day      | tas                                                                                          | longitude latitude time height2m  | Near-Surface Air Temperature                 | K          | ifs code name =  |
| 167.128  |                                                                                              |                                   |                                              |            |                  |
| day      | tasmax                                                                                       | longitude latitude time height2m  | Daily Maximum Near-Surface Air Temperature   | K          | ifs code name =  |
| 201.128  |                                                                                              |                                   |                                              |            |                  |
| day      | tasmin                                                                                       | longitude latitude time height2m  | Daily Minimum Near-Surface Air Temperature   | K          | ifs code name =  |
| 202.128  |                                                                                              |                                   |                                              |            |                  |
| day      | tslsi                                                                                        | longitude latitude time           | Surface Temperature Where Land or Sea Ice    | K          | ifs code name =  |
| 235.128  |                                                                                              |                                   |                                              |            |                  |
| day      | ua                                                                                           | longitude latitude plev8 time     | Eastward Wind                                | m s-1      | ifs code name =  |
| 131.128  |                                                                                              |                                   |                                              |            |                  |
| day      | uas                                                                                          | longitude latitude time height10m | Eastward Near-Surface Wind                   | m s-1      | ifs code name =  |
| 165.128  |                                                                                              |                                   |                                              |            |                  |
| day      | va                                                                                           | longitude latitude plev8 time     | Northward Wind                               | m s-1      | ifs code name =  |
| 132.128  |                                                                                              |                                   |                                              |            |                  |
| day      | vas                                                                                          | longitude latitude time height10m | Northward Near-Surface Wind                  | m s-1      | ifs code name =  |
| 166.128  |                                                                                              |                                   |                                              |            |                  |
| day      | wap                                                                                          | longitude latitude plev8 time     | Omega (=dp/dt)                               | Pa s-1     | ifs code name =  |
| 135.128  |                                                                                              |                                   |                                              |            |                  |
| AERmon   | lwp                                                                                          | longitude latitude time           | Liquid Water Path                            | kg m-2     | ifs code name =  |
| 78.128   |                                                                                              |                                   |                                              |            |                  |
| Emon     | mrso                                                                                         | longitude latitude sdepth time    | Total Water Content of Soil Layer            | kg m-2     | lpjg code name = |
| mrso ifs | code name = 118.129, expression = merge(70*var39,210*var40,720*var41,1890*var42)             |                                   |                                              |            |                  |
| Emon     | rls                                                                                          | longitude latitude time           | Net Longwave Surface Radiation               | W m-2      | ifs code name =  |
| 177.128  |                                                                                              |                                   |                                              |            |                  |
| Emon     | rss                                                                                          | longitude latitude time           | Net Shortwave Surface Radiation              | W m-2      | ifs code name =  |
| 176.128  |                                                                                              |                                   |                                              |            |                  |
| CFday    | clivi                                                                                        | longitude latitude time           | Ice Water Path                               | kg m-2     | ifs code name =  |
| 79.128   |                                                                                              |                                   |                                              |            |                  |
| CFday    | clwvi                                                                                        | longitude latitude time           | Condensed Water Path                         | kg m-2     | ifs code name =  |

116.129, expression = var78+var79

|                                                                                                                                                                                                                                                                                                                                                                                                            |                         |                                 |                                                   |                 |                  |
|------------------------------------------------------------------------------------------------------------------------------------------------------------------------------------------------------------------------------------------------------------------------------------------------------------------------------------------------------------------------------------------------------------|-------------------------|---------------------------------|---------------------------------------------------|-----------------|------------------|
| Oday<br>tos                                                                                                                                                                                                                                                                                                                                                                                                | tos                     | longitude latitude time         | Sea Surface Temperature                           | degC            | nemo code name = |
| Lmon<br>85.129, expression = 1000*(0.07*var39*((var139<270.16)+0.5*(var139<274.16 && var139>270.16)*(1-sin(0.785*(var139-272.16)))) + 0.21*var40*((var170<270.16)+0.5*(var170>270.16)*(1-sin(0.785*(var170-272.16)))) + 0.72*var41*((var183<270.16)+0.5*(var183>274.16 && var183>270.16)*(1-sin(0.785*(var183-272.16)))) + 1.89*var42*((var236<270.16)+0.5*(var236>270.16)*(1-sin(0.785*(var236-272.16)))) | longitude latitude time | Soil Frozen Water Content       | kg m-2                                            | ifs code name = |                  |
| Lmon<br>mrro ifs code name = 205.128                                                                                                                                                                                                                                                                                                                                                                       | mrro                    | longitude latitude time         | Total Runoff                                      | kg m-2 s-1      | lpjg code name = |
| Lmon<br>mrros ifs code name = 8.128                                                                                                                                                                                                                                                                                                                                                                        | mrros                   | longitude latitude time         | Surface Runoff                                    | kg m-2 s-1      | lpjg code name = |
| Lmon<br>mrso ifs code name = 43.129, expression = 70*var39+210*var40+720*var41+1890*var42                                                                                                                                                                                                                                                                                                                  | mrso                    | longitude latitude time         | Total Soil Moisture Content                       | kg m-2          | lpjg code name = |
| Lmon<br>mrsos ifs code name = 99.129, expression = 70*var39+30*var40                                                                                                                                                                                                                                                                                                                                       | mrsos                   | longitude latitude time sdepth1 | Moisture in Upper Portion of Soil Column          | kg m-2          | lpjg code name = |
| Lmon<br>tsl ifs code name = 117.129, expression = merge(var139,var170,var183,var236)                                                                                                                                                                                                                                                                                                                       | tsl                     | longitude latitude sdepth time  | Temperature of Soil                               | K               | lpjg code name = |
| LImon<br>120.129, expression = (var141>0)*(var146+var147+var176+var177)                                                                                                                                                                                                                                                                                                                                    | hfdsn                   | longitude latitude time         | Downward Heat Flux into Snow Where Land over Land | W m-2           | ifs code name =  |
| LImon<br>44.128                                                                                                                                                                                                                                                                                                                                                                                            | sbl                     | longitude latitude time         | Surface Snow and Ice Sublimation Flux             | kg m-2 s-1      | ifs code name =  |
| LImon<br>119.129, expression = 100*(var141>0)                                                                                                                                                                                                                                                                                                                                                              | snc                     | longitude latitude time         | Snow Area Percentage                              | %               | ifs code name =  |
| LImon<br>115.129, expression = 1000*var141/var33                                                                                                                                                                                                                                                                                                                                                           | snd                     | longitude latitude time         | Snow Depth                                        | m               | ifs code name =  |
| LImon<br>45.128                                                                                                                                                                                                                                                                                                                                                                                            | snm                     | longitude latitude time         | Surface Snow Melt                                 | kg m-2 s-1      | ifs code name =  |
| LImon<br>141.128                                                                                                                                                                                                                                                                                                                                                                                           | snw                     | longitude latitude time         | Surface Snow Amount                               | kg m-2          | ifs code name =  |
| LImon<br>238.128                                                                                                                                                                                                                                                                                                                                                                                           | tsn                     | longitude latitude time         | Snow Internal Temperature                         | K               | ifs code name =  |
| Ofx<br>areacello                                                                                                                                                                                                                                                                                                                                                                                           | areacello               | longitude latitude              | Grid-Cell Area for Ocean Variables                | m2              | nemo code name = |
| Ofx<br>basin                                                                                                                                                                                                                                                                                                                                                                                               | basin                   | longitude latitude              | Region Selection Index                            | 1               | nemo code name = |
| Ofx<br>Bathymetry                                                                                                                                                                                                                                                                                                                                                                                          | deptho                  | longitude latitude              | Sea Floor Depth Below Geoid                       | m               | nemo code name = |
| Ofx<br>hfgeou                                                                                                                                                                                                                                                                                                                                                                                              | hfgeou                  | longitude latitude              | Upward Geothermal Heat Flux at Sea Floor          | W m-2           | nemo code name = |
| Ofx<br>sftof                                                                                                                                                                                                                                                                                                                                                                                               | sftof                   | longitude latitude              | Sea Area Percentage                               | %               | nemo code name = |
| 6hrPlevPt<br>151.128                                                                                                                                                                                                                                                                                                                                                                                       | psl                     | longitude latitude time1        | Sea Level Pressure                                | Pa              | ifs code name =  |
| 6hrPlevPt<br>138.128                                                                                                                                                                                                                                                                                                                                                                                       | rv850                   | longitude latitude time1 p850   | Relative Vorticity at 850hPa                      | s-1             | ifs code name =  |
| 6hrPlevPt<br>130.128                                                                                                                                                                                                                                                                                                                                                                                       | ta                      | longitude latitude plev3 time1  | Air Temperature                                   | K               | ifs code name =  |
| 6hrPlevPt<br>131.128                                                                                                                                                                                                                                                                                                                                                                                       | ua                      | longitude latitude plev3 time1  | Eastward Wind                                     | m s-1           | ifs code name =  |
| 6hrPlevPt<br>132.128                                                                                                                                                                                                                                                                                                                                                                                       | va                      | longitude latitude plev3 time1  | Northward Wind                                    | m s-1           | ifs code name =  |
| 6hrPlevPt<br>129.128                                                                                                                                                                                                                                                                                                                                                                                       | zg500                   | longitude latitude time1 p500   | Geopotential Height at 500hPa                     | m               | ifs code name =  |
| Eday<br>137.128                                                                                                                                                                                                                                                                                                                                                                                            | prw                     | longitude latitude time         | Water Vapor Path                                  | kg m-2          | ifs code name =  |
| Eday<br>159.128                                                                                                                                                                                                                                                                                                                                                                                            | zmla                    | longitude latitude time         | Height of Boundary Layer                          | m               | ifs code name =  |
| Heuristic volume estimate for the raw EC-Earth3 IFS output on the T255L91 grid:                                                                                                                                                                                                                                                                                                                            |                         |                                 | 19.2 GB per year                                  |                 |                  |
| Heuristic volume estimate for the raw EC-Earth3 IFS output on the T511L91 grid:                                                                                                                                                                                                                                                                                                                            |                         |                                 | 73.6 GB per year                                  |                 |                  |
| Heuristic volume estimate for the raw EC-Earth3 NEMO output on the ORCA1L75 grid:                                                                                                                                                                                                                                                                                                                          |                         |                                 | 0.6 GB per year                                   |                 |                  |
| Heuristic volume estimate for the raw EC-Earth3 NEMO output on the ORCA025L75 grid:                                                                                                                                                                                                                                                                                                                        |                         |                                 | 8.2 GB per year                                   |                 |                  |
| Heuristic volume estimate for the raw EC-Earth3 TMS output on the TMS 3x2 deg grid:                                                                                                                                                                                                                                                                                                                        |                         |                                 | 0.0 GB per year                                   |                 |                  |
| Heuristic volume estimate for the raw EC-Earth3 LPJG output on the T255 grid:                                                                                                                                                                                                                                                                                                                              |                         |                                 | 0.0 GB per year                                   |                 |                  |
